# Supplementary material for: Adaptive memory reservation strategy for heavy workloads in the Spark environment
Source: PeerJ journal article supplement (doi:10.7717/peerj-cs.2460), 2024-11-13
Supplement: data.zip [file AE.xlsx]

## Sheet: Sheet1
	only_memory	memory_and_disk	only_disk	AMR	DMATS	DMAOM
30	0.597	0.5489	0.7315	0.5447	0.5164	0.5463
40	0.9111	0.8046	0.9807	0.7971	0.7418	0.7983
50	1.5704	1.4908	1.3974	1.2372	1.1679	1.2438
60	2.2803	2.2228	1.8536	1.7059	1.6315	1.7268
70	2.573	2.6306	2.1447	1.9083	2.1839	2.2163
80	2.9431	3.1094	2.4941	2.1742	2.791	2.76
