# Supplementary material for: Adaptive memory reservation strategy for heavy workloads in the Spark environment
Source: PeerJ journal article supplement (doi:10.7717/peerj-cs.2460), 2024-11-13
Supplement: data.zip [file AGC.xlsx]

## Sheet: Sheet1
	only_memory	memory_and_disk	only_disk	AMR	DMATS	DMAOM
30	4.2	4.11	2.1	4	4.05	4.02
40	8.9	9.8	2.1	5.7	8.7	8.6
50	11.35	12.48	2.09	6.75	10.83	10.9
60	13.8	15.15	2.1	7.8	12.95	13.2
70	15.98	17.33	2.1	8.45	15.53	15.58
80	18.15	19.5	2.1	9.1	18.1	17.95
