# Supplementary material for: Adaptive memory reservation strategy for heavy workloads in the Spark environment
Source: PeerJ journal article supplement (doi:10.7717/peerj-cs.2460), 2024-11-13
Supplement: data.zip [file ET.xlsx]

## Sheet: Sheet1
	only_memory	memory_and_disk	only_disk
30	749.35	749.47	1173.43
40	1689.61	1499.14	2000.98
50	3399.13	3449.08	3260.07
60	5350.11	5358.66	4649.14
70	7479.12	7677.32	6021.17
80	9508.99	9950.21	7398.86
