# Supplementary material for: Adaptive memory reservation strategy for heavy workloads in the Spark environment
Source: PeerJ journal article supplement (doi:10.7717/peerj-cs.2460), 2024-11-13
Supplement: data.zip [file GCP.xlsx]

## Sheet: Sheet1
	only_memory	memory_and_disk	only_disk
30	2.02	2.4	1.95
40	7.01	9.98	1.9
50	15	17.45	2.04
60	17.08	19	2.02
70	18.2	22.44	2.01
80	19.1	23.05	2.1
