# Supplementary material for: Adaptive memory reservation strategy for heavy workloads in the Spark environment
Source: PeerJ journal article supplement (doi:10.7717/peerj-cs.2460), 2024-11-13
Supplement: data.zip [file KE.xlsx]

## Sheet: Sheet1
	only_memory	memory_and_disk	only_disk	AMR	DMATS	DMAOM
10	0.1162	0.1161	0.212	0.115	0.1171	0.1169
20	0.321	0.3024	0.4034	0.3019	0.2748	0.2633
30	0.5153	0.4811	0.5883	0.4788	0.4248	0.3937
40	0.7668	0.734	0.773	0.6572	0.5981	0.5931
50	1.1479	1.2424	0.9954	0.8065	0.9559	0.9708
60	1.7156	2.0146	1.3626	1.0708	1.5794	1.5728
