# Supplementary material for: Adaptive memory reservation strategy for heavy workloads in the Spark environment
Source: PeerJ journal article supplement (doi:10.7717/peerj-cs.2460), 2024-11-13
Supplement: data.zip [file KET.xlsx]

## Sheet: Sheet1
	only_memory	memory_and_disk	only_disk	AMR	DMATS	DMAOM
10	496.99	497.01	910.06	492.27	500.66	499.95
20	1379.21	1299.29	1733.23	1298.87	1181.12	1113.21
30	2259.78	2110.39	2579.45	2103.75	1863.09	1726.46
40	3348.26	3205.65	3375.38	2870.69	2611.51	2591.58
50	5266.56	5702.51	4566.66	3707.66	4385.53	4453.75
60	7819.14	9181.51	6210.14	4881.92	7197.89	7166.56
