# Supplementary material for: Adaptive memory reservation strategy for heavy workloads in the Spark environment
Source: PeerJ journal article supplement (doi:10.7717/peerj-cs.2460), 2024-11-13
Supplement: data.zip [file KGC.xlsx]

## Sheet: Sheet1
	only_memory	memory_and_disk	only_disk	AMR	DMATS	DMAOM
10	3.1	3.5	2.5	3.11	3.1	3
20	6.31	7	2.3	4.02	4.3	4.2
30	9.1	9.8	2.4	5.2	6.5	6.3
40	13.02	14.5	2.7	6.3	12	11.65
50	16.53	19.5	2.8	6.9	16.5	16
60	19.7	24.9	3.01	7.1	19.8	19.1
