# Supplementary material for: Adaptive memory reservation strategy for heavy workloads in the Spark environment
Source: PeerJ journal article supplement (doi:10.7717/peerj-cs.2460), 2024-11-13
Supplement: data.zip [file PE.xlsx]

## Sheet: Sheet1
	only_memory	memory_and_disk	only_disk	AMR	DMATS	DMAOM
30	0.1624	0.1632	0.2574	0.1598	0.1628	0.1613
40	0.3593	0.3188	0.4255	0.3081	0.3102	0.3187
50	0.7228	0.7332	0.6933	0.5593	0.5317	0.5633
60	1.1291	1.1308	0.9912	0.7809	0.7813	0.7957
70	1.5784	1.6202	1.2705	0.9497	1.1819	1.3062
80	1.9766	2.0685	1.5381	1.1579	1.499	1.6429
